# Supplementary material for: Mammaglobin B may be a prognostic biomarker of uterine corpus endometrial cancer
Source: PubMed Central journal article supplement — Oncol Lett. 2020 Sep 18;20(5):255. doi: 10.3892/ol.2020.12118 (PMC7509766; doi:10.3892/ol.2020.12118), 2020-09-18
Supplement: Supplementary_Data.pdf [file Supplementary_Data.pdf]

Figure S1. Differential expression analysis of SCGB2A1 using The Cancer Genome Atlas database. Differential mRNA expression of SCGB2A1 between normal tissues and uterine corpus endometrial carcinoma samples, including (A) G3 cancer, (B) with tumor, (C) peritoneal cytology-positive, (D) stage III or IV, (E) stage IV, and (F) SEA tissues. SCGB2A1, secretoglobulin family 2A member 1; SEA, serous endometrial adenocarcinoma.

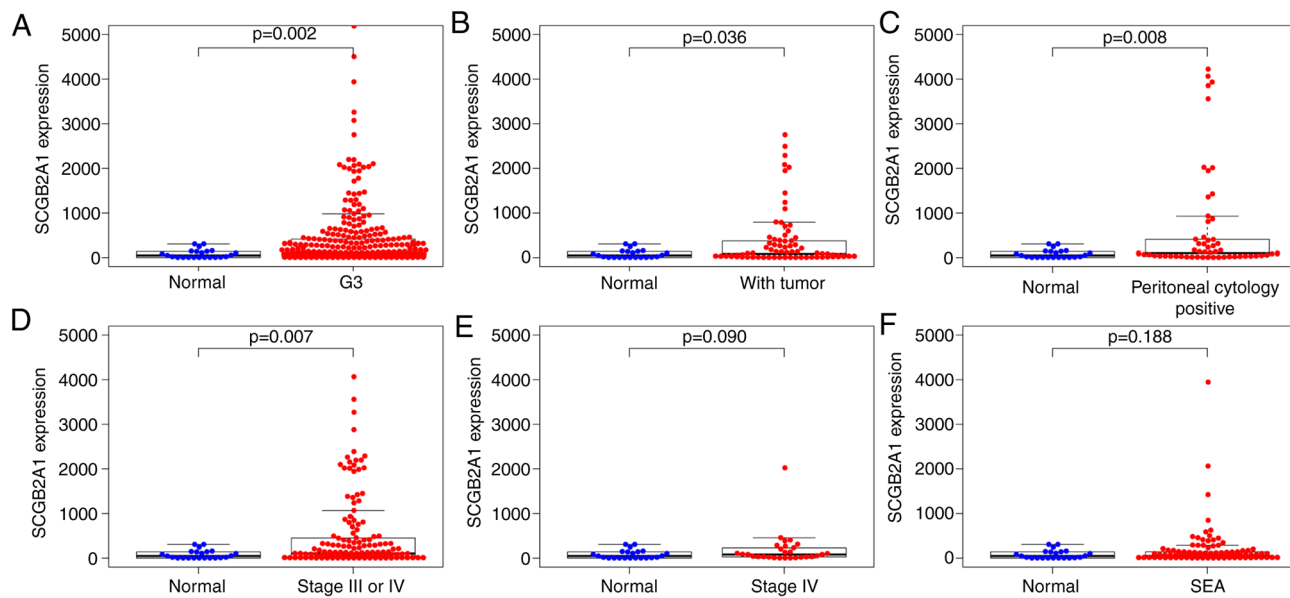

Table SI. SCGB2A1 expression in cancer versus normal tissues in the Oncomine database.

| Cancer            | Cancer type                            | P-value                | Fold change | Rank, % | Sample counts, n | Reference (PMID) |
|-------------------|----------------------------------------|------------------------|-------------|---------|------------------|------------------|
| Breast cancer     | Invasive breast carcinoma stroma       | 1.22x10 <sup>-12</sup> | 11.867      | 9       | 59               | 18438415         |
|                   | Medullary breast carcinoma             | 7.97x10 <sup>-10</sup> | -4.09       | 8       | 176              | 24582497         |
| Colorectal cancer | Colon carcinoma                        | 1.80x10 <sup>-14</sup> | -34.865     | 1       | 15               | 20957034         |
|                   | Colon adenoma epithelia                | 4.33x10 <sup>-11</sup> | -17.778     | 1       | 15               | 20957034         |
|                   | Colon adenoma                          | 7.47x10 <sup>-11</sup> | -23.721     | 1       | 15               | 20957034         |
|                   | Colon carcinoma epithelia              | 3.17x10 <sup>-11</sup> | -36.856     | 1       | 15               | 20957034         |
|                   | Colon adenocarcinoma                   | 3.07x10 <sup>-33</sup> | -11.242     | 1       | 123              | TCGA             |
|                   | Rectal adenocarcinoma                  | 1.71x10 <sup>-18</sup> | -9.059      | 4       | 82               | TCGA             |
|                   | Cecum adenocarcinoma                   | 2.85x10 <sup>-9</sup>  | -11.210     | 9       | 44               | TCGA             |
|                   | Colon mucinous adenocarcinoma          | 1.56x10 <sup>-7</sup>  | -6.095      | 12      | 44               | TCGA             |
|                   | Colorectal carcinoma                   | 3.56x10 <sup>-17</sup> | -13.847     | 2       | 82               | 20143136         |
|                   | Rectal adenocarcinoma                  | 3.56x10 <sup>-28</sup> | -10.032     | 3       | 130              | 20725992         |
|                   | Colon adenocarcinoma                   | 2.27x10 <sup>-7</sup>  | -3.153      | 3       | 46               | 17615082         |
|                   | Rectosigmoid adenocarcinoma            | 3.60x10 <sup>-5</sup>  | -2.905      | 4       | 15               | 17615082         |
|                   | Colorectal carcinoma                   | 1.74x10 <sup>-10</sup> | -6.488      | 4       | 60               | 20957034         |
|                   | Colorectal adenocarcinoma              | 1.57x10 <sup>-6</sup>  | -2.673      | 7       | 69               | 20957034         |
|                   | Colon adenoma                          | 1.69x10 <sup>-8</sup>  | -2.452      | 4       | 64               | 18171984         |
| Esophageal cancer | Barrett's esophagus                    | 3.23x10 <sup>-5</sup>  | 4.536       | 9       | 43               | 21152079         |
| Gastric cancer    | Diffuse gastric adenocarcinoma         | 1.42x10 <sup>-10</sup> | -8.275      | 1       | 50               | 23112551         |
|                   | Gastric intestinal type adenocarcinoma | 5.19x10 <sup>-6</sup>  | -5.821      | 2       | 39               | 23112551         |
|                   | Gastric mixed adenocarcinoma           | 8.94x10 <sup>-5</sup>  | -6.739      | 3       | 29               | 23112551         |
|                   | Gastric intestinal type adenocarcinoma | 2.64x10 <sup>-8</sup>  | -21.390     | 1       | 57               | 19081245         |
|                   | Gastric cancer                         | 6.08x10 <sup>-5</sup>  | -5.545      | 3       | 160              | 21445269         |
| Kidney cancer     | Renal pelvis urothelial carcinoma      | 6.40x10 <sup>-9</sup>  | 2.164       | 4       | 31               | 16115910         |
|                   | Renal oncocytoma                       | 1.08x10 <sup>-10</sup> | 2.405       | 4       | 35               | 16115910         |
|                   | Chromophobe renal cell carcinoma       | 8.91x10 <sup>-6</sup>  | 2.692       | 6       | 29               | 16115910         |
|                   | Papillary renal cell carcinoma         | 1.48x10 <sup>-7</sup>  | 2.639       | 7       | 34               | 16115910         |
|                   | Clear cell renal cell carcinoma        | 1.13x10 <sup>-10</sup> | -3.329      | 8       | 46               | 16115910         |
| Melanoma          | Benign melanocytic skin nevus          | 6.90x10 <sup>-12</sup> | -54.318     | 1       | 25               | 16243793         |
|                   | Cutaneous melanoma                     | 1.40x10 <sup>-9</sup>  | -68.060     | 3       | 52               | 16243793         |
| Ovarian cancer    | Ovarian clear cell adenocarcinoma      | 5.47x10 <sup>-5</sup>  | 3.403       | 6       | 12               | 27538791         |
|                   | Ovarian endometrioid adenocarcinoma    | 1.78x10 <sup>-5</sup>  | 4.200       | 8       | 41               | 27538791         |
|                   | Ovarian carcinoma                      | 2.23x10 <sup>-9</sup>  | 11.625      | 6       | 195              | 25944803         |
|                   | Ovarian serous adenocarcinoma          | 2.78x10 <sup>-5</sup>  | 18.530      | 7       | 53               | 19486012         |
|                   | Ovarian serous cystadenocarcinoma      | 5.10x10 <sup>-7</sup>  | -3.746      | 2       | 594              | TCGA             |
| Prostate cancer   | Prostate adenocarcinoma                | 6.00x10 <sup>-5</sup>  | -2.311      | 5       | 89               | 18245496         |
| Sarcoma           | Gastrointestinal stromal tumor         | 5.39x10 <sup>-12</sup> | -18.803     | 1       | 25               | 29725014         |

SCGB2A1, secretoglobulin family 2A member 1; TCGA, The Cancer Genome Atlas.

Table SII. Detailed information of the disqualified samples.

| Characteristics         | Patient number                          |                                         |                                         |                                         |                                   |
|-------------------------|-----------------------------------------|-----------------------------------------|-----------------------------------------|-----------------------------------------|-----------------------------------|
|                         | 1                                       | 2                                       | 3                                       | 4                                       | 5                                 |
| Reason for discarding   | Abnormal data (BMI)                     | Gene expression data missing            | Gene expression data missing            | Gene expression data missing            | Gene expression data missing      |
| Patient ID              | TCGA-SJ-A6ZI                            | TCGA-AJ-A6NU                            | TCGA-DI-A1C3                            | TCGA-AP-A0LQ                            | TCGA-AJ-A4ZG                      |
| Survival time, days     | 428                                     | 632                                     | 739                                     | 2,457                                   | 498                               |
| Survival status         | Alive                                   | Alive                                   | Alive                                   | Alive                                   | Alive                             |
| Age, years              | 64                                      | 64                                      | 38                                      | 59                                      | 53                                |
| Grade                   | G1                                      | G1                                      | G2                                      | G2                                      | G3                                |
| Stage                   | Stage I                                 | Stage II                                | Stage I                                 | Stage I                                 | Stage IV                          |
| Status                  | Tumor free                              | Tumor free                              | Tumor free                              | Tumor free                              | With tumor                        |
| Histology               | Endometrioid endometrial adenocarcinoma | Endometrioid endometrial adenocarcinoma | Endometrioid endometrial adenocarcinoma | Endometrioid endometrial adenocarcinoma | Serous endometrial adenocarcinoma |
| Surgical approach       | Open                                    | Minimally Invasive                      | Unknown                                 | Open                                    | Unknown                           |
| Myometrial invasion, %  | 75                                      | 0                                       | 8.60                                    | 5                                       | 31                                |
| Peritoneal cytology     | Negative                                | Negative                                | Unknown                                 | Negative                                | Positive                          |
| Residual tumor          | R0                                      | R0                                      | R0                                      | R0                                      | Unknown                           |
| Pelvic lymph nodes      | Negative                                | Negative                                | Unknown                                 | Negative                                | Unknown                           |
| Para-aortic lymph nodes | Negative                                | Negative                                | Unknown                                 | Negative                                | Unknown                           |
| Height, cm              | 66                                      | 165                                     | 171                                     | 163                                     | 163                               |
| Weight, kg              | 93                                      | 167                                     | 144                                     | 95                                      | 85                                |
| BMI                     | 213.5                                   | 61.3                                    | 49.2                                    | 35.8                                    | 32.0                              |

BMI, body mass index.
